# Supplementary material for: Water scaling of ecosystem carbon cycle feedback to climate warming
Source: PubMed Central journal article supplement — Sci Adv. 2019 Aug 21;5(8):eaav1131. doi: 10.1126/sciadv.aav1131 (PMC6703863; doi:10.1126/sciadv.aav1131), 2019-08-21
Supplement: aav1131_SM.pdf [file aav1131_SM.pdf]

## Supplementary Materials for

### Water scaling of ecosystem carbon cycle feedback to climate warming

Quan Quan, Dashuan Tian, Yiqi Luo, Fangyue Zhang, Tom W. Crowther, Kai Zhu,  
Han Y. H. Chen, Qingping Zhou, Shuli Niu\*

\*Corresponding author. Email: sniu@igsnr.ac.cn

Published 21 August 2019, *Sci. Adv.* **5**, eaav1131 (2019)  
DOI: 10.1126/sciadv.aav1131

#### This PDF file includes:

Table S1. Site information in global meta-analysis.

Table S2. Effects of mean annual precipitation (MAP), mean annual temperature (MAT), experimental warming magnitude, duration, and their interactions on relative changes in NEP across global herbaceous ecosystems with a linear mixed-effect model.

Table S3. Repeated-measures ANOVA results ( $F$  values) on the effects of warming ( $W$ ), year ( $Y$ ), and their interactions on GEP, ER, NEP, ST ( $T_{\text{soil}}$ ), and moisture ( $M_{\text{soil}}$ ).

Table S4. Repeated-measures ANOVA results ( $F$  values) on the effects of warming ( $W$ ), measured time ( $T$ ), and their interactions on GEP, ER, NEP, ST ( $T_{\text{soil}}$ ), and moisture ( $M_{\text{soil}}$ ) in 2014–2016.

Table S5. Comparison of the nonthreshold and threshold models based on the AIC for GEP, ER, and NEP.

Table S6. Coefficients of threshold model (means and 95% confidence intervals) (Eq. 4).

Fig. S1. Seasonal dynamics and means of ST and SWC at 10-cm depth under three warming treatments in 2014 to 2016.

Fig. S2. Seasonal means of GEP, ER, and NEP under different warming treatments in 2014 to 2016.

Fig. S3. Warming-induced changes in GEP, ER, and NEP within the year.

Fig. S4. Relationships between ST and GEP, ER, or NEP across seasons and plots.

Fig. S5. Relationships between warming-induced response ratio of ecosystem carbon fluxes with monthly precipitation.

Fig. S6. The relationship between response ratio of monthly mean SWC and monthly precipitation in a precipitation gradient experiment at our study site from 2015 to 2016.

Fig. S7. Relationships between the modeled and observed values of carbon fluxes with 1:1 line.

Fig. S8. Relationships between SWC and ecosystem C fluxes within peak growing seasons (July and August).

References (41–65)

**Table S1. Site information in global meta-analysis.** MAP-mean annual precipitation, MAT-mean annual temperature, ST-soil temperature.

| Studies | Ecosystem           | Latitude | Longitude | MAP   | MAT   | ST.change | Warming.method     | Reference  |
|---------|---------------------|----------|-----------|-------|-------|-----------|--------------------|------------|
| s1      | Wetland             | 46.85    | -88.37    | 833   | 4.5   | 1.9       | Infrared lamps     | (41)       |
| s2      | Alpine grassland    | 34.82    | 92.93     | 290.9 | -3.8  | 1.59~2.09 | Infrared heater    | (42)       |
| s3      | Alpine grassland    | 31.44    | 92.02     | 431.7 | -1.2  | 1.52      | OTCs               | (43)       |
| s4      | Temperate grassland | 44.50    | 123.52    | 471   | 6.4   | 1.7       | Infrared radiators | (44)       |
| s5      | Wetland             | 61.78    | 24.30     | 700   | 3.5   | 0.3       | OTCs               | (45)       |
| s6      | Wetland             | 62.21    | 23.38     | 700   | 3.5   | 1.1       | OTCs               | (45)       |
| s7      | Wetland             | 67.98    | 24.20     | 700   | 3.5   | 0.5       | OTCs               | (45)       |
| s8      | Abandoned farmland  | 43.07    | -81.33    | 595   | 7.5   | 0.7       | Infrared heater    | (46)       |
| s9      | Temperate grassland | 42.03    | 116.28    | 382.3 | 2.1   | 1.2       | Infrared heater    | (11)       |
| s10     | Tundra              | 70.45    | -157.40   | 139   | -11.9 | 1.5       | OTCs               | (47)       |
| s11     | Tundra              | 71.30    | -156.67   | 113   | -12.6 | 1.5       | OTCs               | (47)       |
| s12     | Tundra              | 68.63    | -149.57   | 250   | -8.6  | 1.5       | OTCs               | (47)       |
| s13     | Tundra              | 78.88    | -75.92    | 200   | -14.6 | 1.5       | OTCs               | (47)       |
| s14     | Tallgrass prairie   | 34.98    | -97.52    | 914   | 16.3  | 2.8       | Infrared heater    | (48)       |
| s15     | Tundra              | 70.37    | -148.57   | 195   | -11.6 | 1.13      | OTCs               | (49)       |
| s16     | Tundra              | 68.63    | -149.57   | 250   | -8.6  | 2.5~3     | OTCs               | (50)       |
| s17     | Temperate grassland | 42.03    | 116.28    | 382.3 | 2.1   | 1.07      | Infrared heater    | (51)       |
| s18     | Alpine grassland    | 36.95    | 100.85    | 454   | 1.34  | 1.03      | OTCs               | (52)       |
| s19     | Temperate grassland | 41.79    | 111.90    | 280   | 3.4   | 2         | Infrared heater    | (53)       |
| s20     | Tundra              | 68.63    | -149.57   | 250   | -8.6  | 1.2       | greenhouse         | (54)       |
| s21     | Tundra              | 78.90    | -75.92    | 200   | -14.6 | 0.4~1.8   | OTCs               | (55)       |
| s22     | Temperate grassland | 42.03    | 116.28    | 383   | 2.1   | 1.79      | Infrared heater    | (56)       |
| s23     | Tallgrass prairie   | 34.98    | -97.52    | 914   | 16.3  | 2.79      | Infrared heater    | (57)       |
| s24     | Alpine grassland    | 34.82    | 92.93     | 329   | -3.8  | 1.77      | Infrared heater    | (58)       |
| s25     | Wetland             | 55.35    | -112.52   | 462   | 0.9   | 0.6~0.7   | OTCs               | (59)       |
| s26     | Alpine grassland    | 32.45    | 102.37    | 752.4 | 1.1   | 0.52~1.46 | OTCs               | (60)       |
| s27     | Tundra              | 71.32    | -156.60   | 113   | -12.6 | 2         | silicon heaters    | (61)       |
| s28     | Alpine grassland    | 36.71    | 100.79    | 291   | -4.6  | 0.6       | OTCs               | (62)       |
| s29     | Alpine grassland    | 32.80    | 102.97    | 753   | 1.1   | 1.78~2.91 | Infrared heater    | This study |
| s30     | Temperate grassland | 42.03    | 116.28    | 494.5 | 2.4   | 0.4       | Infrared heater    | (24)       |
| s31     | Alpine grassland    | 31.44    | 92.02     | 430   | -1.16 | 1.1~1.4   | OTCs               | (63)       |
| s32     | Alpine grassland    | 31.39    | 90.03     | 300   | 0     | 1.5       | OTCs               | (63)       |
| s33     | Temperate grassland | 41.78    | 111.89    | 248   | 3.4   | 0.59      | Infrared heater    | (64)       |
| s34     | Temperate grassland | 34.82    | 114.28    | 627   | 14.3  | 0.21~0.83 | Infrared heater    | (65)       |

**Table S2. Effects of mean annual precipitation (MAP), mean annual temperature (MAT), experimental warming magnitude, duration, and their interactions on relative changes in NEP across global herbaceous ecosystems with a linear mixed-effect model.** MAP, MAT, magnitude and duration are considered as fixed effect, while studies as random effect.

|               | Sum Sq   | Mean Sq  | NumDF | DenDF | F.value | Pr(>F) |
|---------------|----------|----------|-------|-------|---------|--------|
| MAP           | 11454.73 | 11454.73 | 1     | 36.31 | 5.22    | 0.03   |
| MAT           | 518.72   | 518.72   | 1     | 25.64 | 0.24    | 0.63   |
| duration      | 7993.24  | 7993.24  | 1     | 31.11 | 3.64    | 0.07   |
| magnitude     | 1400.14  | 1400.14  | 1     | 40.94 | 0.64    | 0.43   |
| MAP×MAT       | 433.26   | 433.26   | 1     | 25.56 | 0.20    | 0.66   |
| MAP×duration  | 7224.87  | 7224.87  | 1     | 31.18 | 3.29    | 0.08   |
| MAP×magnitude | 1459.39  | 1459.39  | 1     | 40.99 | 0.66    | 0.42   |

**Table S3. Repeated-measures ANOVA results (*F* values) on the effects of warming (*W*), year (*Y*), and their interactions on GEP, ER, NEP, ST ( $T_{\text{soil}}$ ), and moisture ( $M_{\text{soil}}$ ).**

|          | GEP        | ER         | NEP      | $T_{\text{soil}}$ | $M_{\text{soil}}$ |
|----------|------------|------------|----------|-------------------|-------------------|
| W        | 2.38***    | 5.02*      | 1.55     | 369.66***         | 237.65***         |
| year     | 1024.08*** | 1442.01*** | 96.59*** | 1934.59***        | 1087.87***        |
| W × year | 18.56***   | 10.88***   | 17.45*** | 9.02***           | 27.02***          |

Level of significance: \*\*\*:  $P < 0.001$ ; \*\*:  $0.001 \leq P < 0.01$ ; \*:  $0.01 \leq P < 0.05$

**Table S4. Repeated-measures ANOVA results (*F* values) on the effects of warming (*W*), measured time (*T*), and their interactions on GEP, ER, NEP, ST (*T*<sub>soil</sub>), and moisture (*M*<sub>soil</sub>) in 2014–2016.**

|       | GEP       | ER        | NEP       | T <sub>soil</sub> | M <sub>soil</sub> |
|-------|-----------|-----------|-----------|-------------------|-------------------|
| 2014  |           |           |           |                   |                   |
| W     | 2.15      | 13.63**   | 0.55      | 37.47***          | 71.85***          |
| T     | 273.51*** | 260.71*** | 105.75*** | 395.60***         | 444.74***         |
| W × T | 6.36***   | 3.16**    | 7.32***   | 7.72***           | 8.97***           |
| 2015  |           |           |           |                   |                   |
| W     | 12.90**   | 4.66*     | 21.22***  | 267.13***         | 56.28***          |
| T     | 100.58*** | 114.24*** | 51.06***  | 220.59***         | 290.76***         |
| W × T | 9.29***   | 8.96***   | 6.59***   | 17.80***          | 19.88***          |
| 2016  |           |           |           |                   |                   |
| W     | 69.07***  | 5.99*     | 15.42***  | 348.95***         | 217.98***         |
| T     | 779.30*** | 254.96*** | 63.71***  | 282.83***         | 478.84***         |
| W × T | 48.94***  | 14.17***  | 5.20***   | 2.27*             | 11.61***          |

Level of significance: \*\*\*:  $P < 0.001$ ; \*\*:  $0.001 \leq P < 0.01$ ; \*:  $0.01 \leq P < 0.05$

**Table S5. Comparison of the nonthreshold and threshold models based on the AIC for GEP, ER, and NEP.**

| Model | GEP    | ER     | NEP    |
|-------|--------|--------|--------|
| (1)   | 413.42 | 311.93 | 309.19 |
| (2)   | 378.01 | 321.17 | 279.27 |
| (3)   | 388.96 | 311.75 | 310.49 |
| (4)   | 347.70 | 280.30 | 266.94 |

Nonlinear model was chosen due to its lower AIC.

**Table S6. Coefficients of threshold model (means and 95% confidence intervals) (Eq. 4).** Abbreviations of the carbon fluxes: gross ecosystem productivity (GEP), ecosystem respiration (ER), net ecosystem productivity (NEP).

|     | $\gamma_1$                 | $\gamma_2$                    | $\gamma_3$                 |
|-----|----------------------------|-------------------------------|----------------------------|
| GEP | 0.4843<br>(0.3542, 0.6572) | -0.0084<br>(-0.0117, -0.0060) | 0.0624<br>(0.0430, 0.0819) |
| ER  | 0.1973<br>(0.1424, 0.2706) | -0.0032<br>(-0.0045, -0.0022) | 0.0766<br>(0.0569, 0.0965) |
| NEP | 0.3182<br>(0.2220, 0.4525) | -0.0060<br>(-0.0087, -0.0041) | 0.0454<br>(0.0224, 0.0683) |

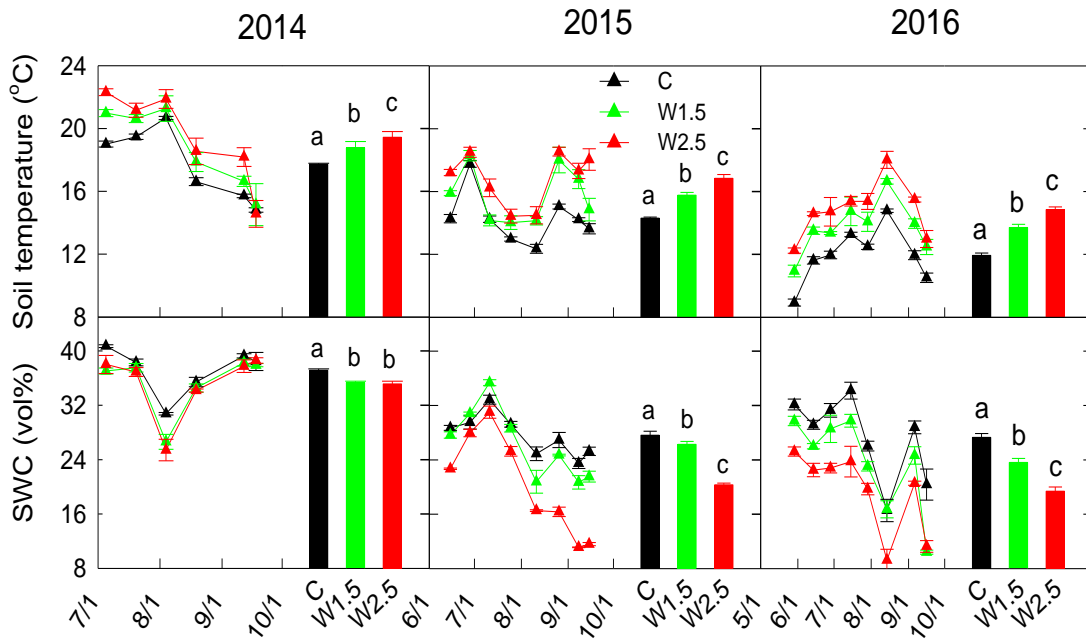

**Fig. S1. Seasonal dynamics and means of ST and SWC at 10-cm depth under three warming treatments in 2014 to 2016.** C: control; W1.5: low-level warming; W2.5: high-level warming. Different letters above the bars indicate a significant difference between treatments.

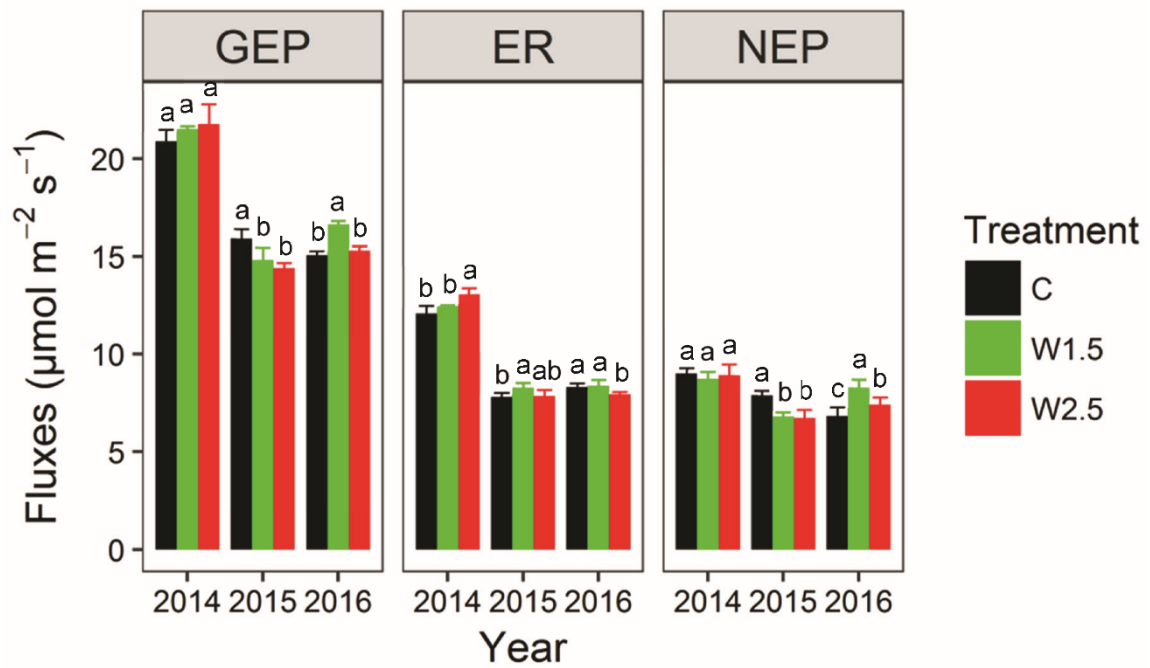

**Fig. S2. Seasonal means of GEP, ER, and NEP under different warming treatments in 2014 to 2016.** C: control; W1.5: low-level warming; W2.5: high-level warming. Different letters above the bars indicate a significant difference between treatments in each year.

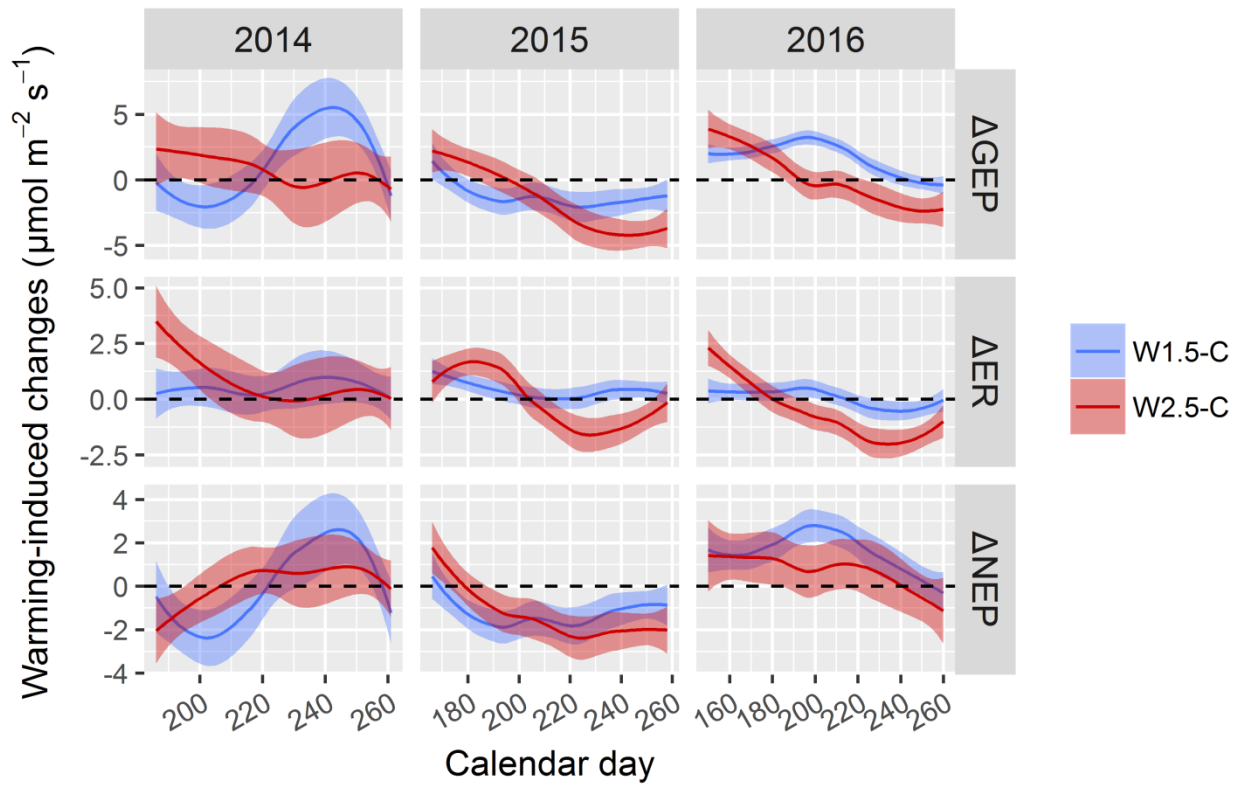

**Fig. S3. Warming-induced changes in GEP, ER, and NEP within the year.** C: control; W1.5: low level warming; W2.5: high level warming; W1.5-C represents the warming effect calculated as the W1.5 treatment minus the Control, and W2.5-C means the warming effect as the W2.5 treatment minus the Control.



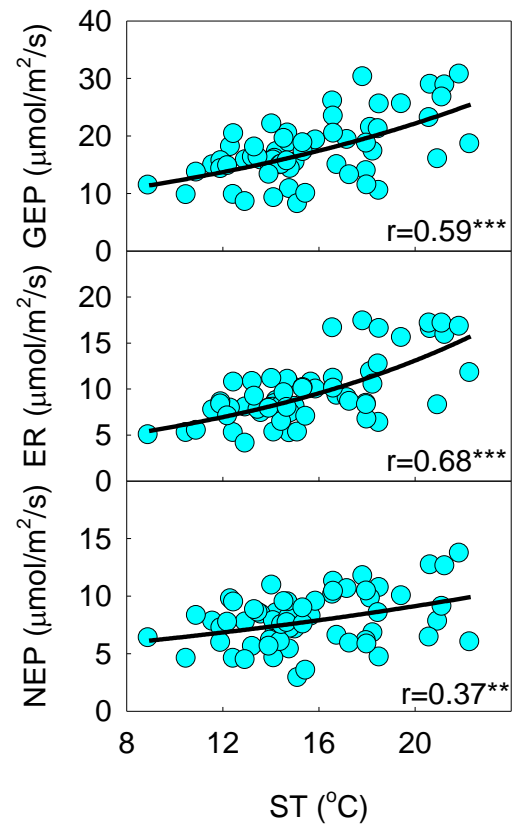

**Fig. S4. Relationships between ST and GEP, ER, or NEP across seasons and plots.**  
Level of significance: \*\*\*:  $P < 0.01$ ; \*\*:  $0.01 \leq P < 0.05$ .

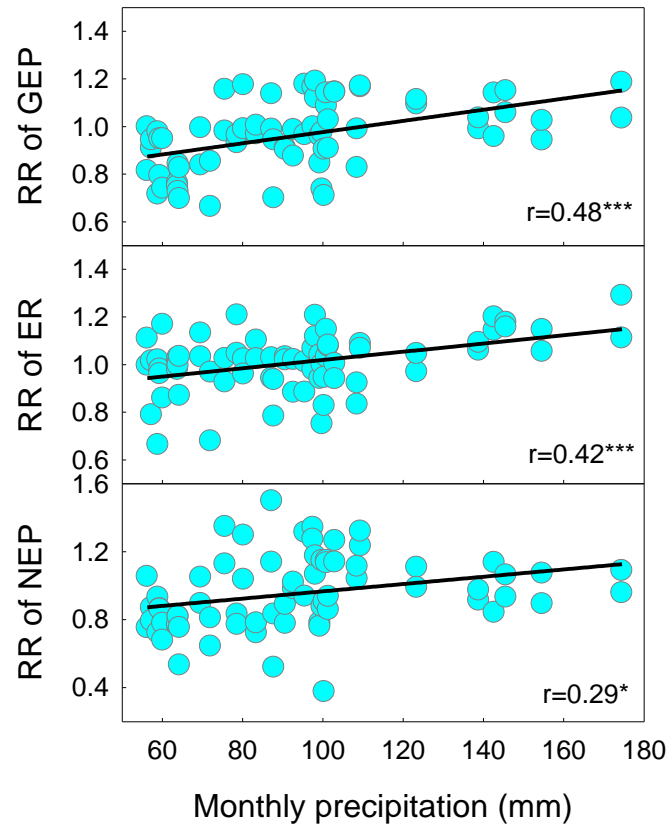

**Fig. S5. Relationships between warming-induced response ratio of ecosystem carbon fluxes with monthly precipitation.** The RR was quantified by treatment/control. GEP-gross ecosystem productivity, ER-ecosystem respiration and NEP-net ecosystem productivity. Level of significance: \*\*\*:  $P < 0.01$ ; \*\*:  $0.01 \leq P < 0.05$ ; \*:  $0.05 \leq P < 0.1$ .

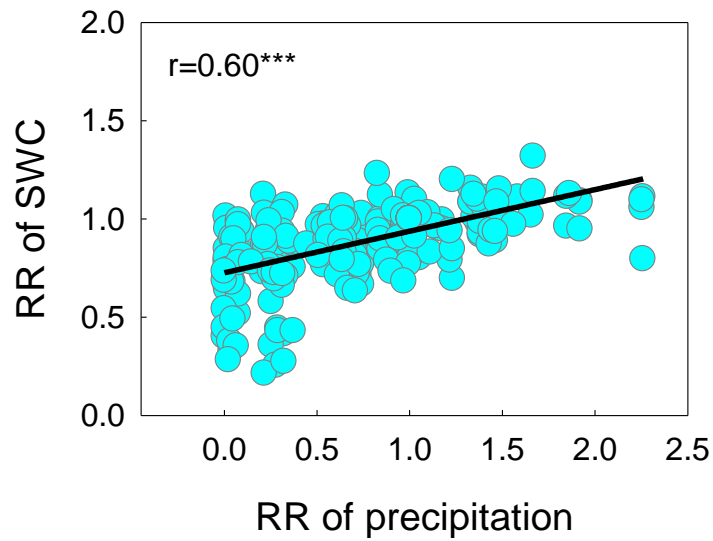

**Fig. S6. The relationship between response ratio of monthly mean SWC and monthly precipitation in a precipitation gradient experiment at our study site from 2015 to 2016.** The experiment includes 6 precipitation treatments of 1/12p, 1/4p, 1/2p, 3/4p, p and 5/4p with p representing ambient precipitation in the growing season (See the detailed information in Zhang et al. 2018). The relative changes of precipitation and SWC were quantified by the response ratio (RR, treatment/control). Level of significance: \*\*\*:  $P < 0.01$ ; \*\*:  $0.01 \leq P < 0.05$ ; \*:  $0.05 \leq P < 0.1$ .

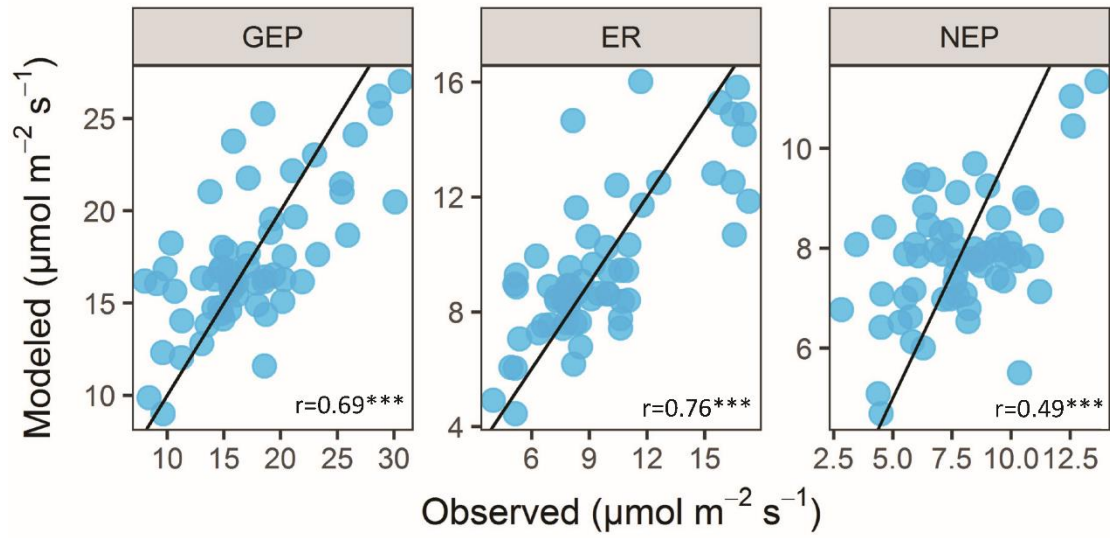

**Fig. S7. Relationships between the modeled and observed values of carbon fluxes with 1:1 line.** Level of significance: \*\*\*:  $P < 0.01$ ; \*\*:  $0.01 \leq P < 0.05$ ; \*:  $0.05 \leq P < 0.1$ . Abbreviations of the carbon fluxes: gross ecosystem productivity (GEP), ecosystem respiration (ER), net ecosystem productivity (NEP).

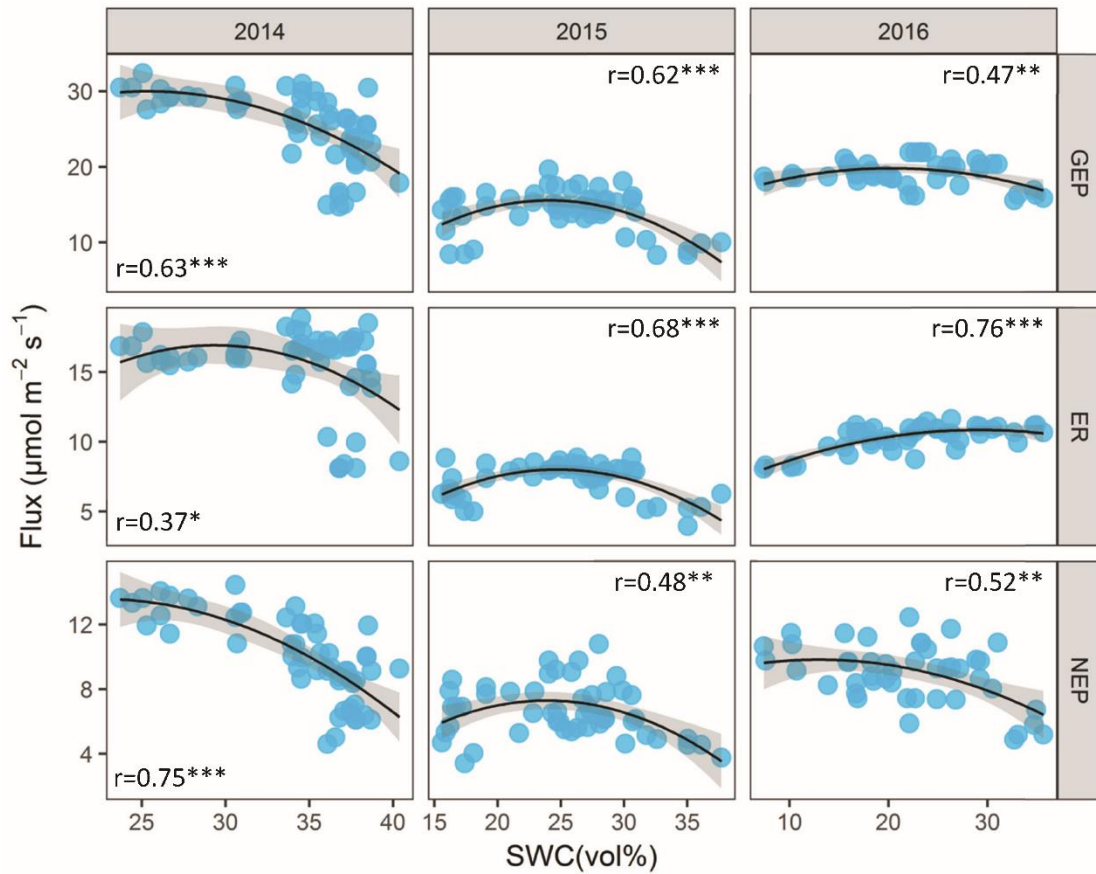

**Fig. S8. Relationships between SWC and ecosystem C fluxes within peak growing seasons (July and August).** Level of significance:  $***: P < 0.01$ ;  $**: 0.01 \leq P < 0.05$ ;  $*: 0.05 \leq P < 0.1$ . Abbreviations of the carbon fluxes: gross ecosystem productivity (GEP), ecosystem respiration (ER), net ecosystem productivity (NEP).
